# Supplementary material for: Synthesis of Tetracyclic Spirooxindolepyrrolidine-Engrafted Hydantoin Scaffolds: Crystallographic Analysis, Molecular Docking Studies and Evaluation of Their Antimicrobial, Anti-Inflammatory and Analgesic Activities
Source: MDPI journal article supplement (doi:10.3390/molecules28217443), 2023-11-06

## checkCIF/PLATON report

Structure factors have been supplied for datablock(s) mo\_b1515\_0m

THIS REPORT IS FOR GUIDANCE ONLY. IF USED AS PART OF A REVIEW PROCEDURE FOR PUBLICATION, IT SHOULD NOT REPLACE THE EXPERTISE OF AN EXPERIENCED CRYSTALLOGRAPHIC REFEREE.

No syntax errors found.      CIF dictionary      Interpreting this report

### Datablock: mo\_b1515\_0m

---

Bond precision:      C-C = 0.0021 Å      Wavelength=0.71073

Cell:                      a=12.1123 (9)                      b=12.5291 (10)                      c=15.0421 (11)  
                              alpha=95.793 (3)                      beta=91.329 (3)                      gamma=99.674 (3)  
Temperature:              100 K

|                        | Calculated                                                                             | Reported                                                                                 |
|------------------------|----------------------------------------------------------------------------------------|------------------------------------------------------------------------------------------|
| Volume                 | 2236.9 (3)                                                                             | 2236.9 (3)                                                                               |
| Space group            | P -1                                                                                   | P -1                                                                                     |
| Hall group             | -P 1                                                                                   | -P 1                                                                                     |
| Moiety formula         | 2 (C <sub>25</sub> H <sub>19</sub> F N <sub>4</sub> O <sub>3</sub> ), H <sub>2</sub> O | C <sub>25</sub> H <sub>19</sub> F N <sub>4</sub> O <sub>3</sub> , 0.5 (H <sub>2</sub> O) |
| Sum formula            | C <sub>50</sub> H <sub>40</sub> F <sub>2</sub> N <sub>8</sub> O <sub>7</sub>           | C <sub>25</sub> H <sub>20</sub> F N <sub>4</sub> O <sub>3.50</sub>                       |
| Mr                     | 902.90                                                                                 | 451.45                                                                                   |
| Dx, g cm <sup>-3</sup> | 1.340                                                                                  | 1.341                                                                                    |
| Z                      | 2                                                                                      | 4                                                                                        |
| Mu (mm <sup>-1</sup> ) | 0.097                                                                                  | 0.097                                                                                    |
| F000                   | 940.0                                                                                  | 940.0                                                                                    |
| F000'                  | 940.46                                                                                 |                                                                                          |
| h, k, lmax             | 17, 18, 22                                                                             | 17, 18, 22                                                                               |
| Nref                   | 15062                                                                                  | 14895                                                                                    |
| Tmin, Tmax             | 0.913, 0.973                                                                           | 0.510, 0.565                                                                             |
| Tmin'                  | 0.913                                                                                  |                                                                                          |

Correction method= # Reported T Limits: Tmin=0.510 Tmax=0.565  
AbsCorr = MULTI-SCAN

Data completeness= 0.989      Theta (max)= 31.616

|                                 |                   |
|---------------------------------|-------------------|
| R(reflections)= 0.0509 ( 12486) | wR2(reflections)= |
| S = 1.052                       | 0.1365 ( 14895)   |
| Npar= 644                       |                   |

---

The following ALERTS were generated. Each ALERT has the format

**test-name\_ALERT\_alert-type\_alert-level.**

Click on the hyperlinks for more details of the test.

---

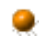

#### **Alert level B**

PLAT420\_ALERT\_2\_B D-H Bond Without Acceptor O7 --H7C . Please Check

---

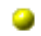

#### **Alert level C**

PLAT042\_ALERT\_1\_C Calc. and Reported MoietyFormula Strings Differ Please Check  
PLAT420\_ALERT\_2\_C D-H Bond Without Acceptor N8 --H8 . Please Check  
PLAT906\_ALERT\_3\_C Large K Value in the Analysis of Variance ..... 2.535 Check  
PLAT911\_ALERT\_3\_C Missing FCF Refl Between Thmin & STh/L= 0.600 52 Report

---

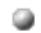

#### **Alert level G**

PLAT045\_ALERT\_1\_G Calculated and Reported Z Differ by a Factor ... 0.500 Check  
PLAT063\_ALERT\_4\_G Crystal Size Possibly too Large for Beam Size .. 0.94 mm  
PLAT154\_ALERT\_1\_G The s.u.'s on the Cell Angles are Equal ..(Note) 0.003 Degree  
PLAT793\_ALERT\_4\_G Model has Chirality at C2 (Centro SPGR) S Verify  
PLAT793\_ALERT\_4\_G Model has Chirality at C9 (Centro SPGR) R Verify  
PLAT793\_ALERT\_4\_G Model has Chirality at C12 (Centro SPGR) R Verify  
PLAT793\_ALERT\_4\_G Model has Chirality at C19 (Centro SPGR) S Verify  
PLAT793\_ALERT\_4\_G Model has Chirality at C27 (Centro SPGR) S Verify  
PLAT793\_ALERT\_4\_G Model has Chirality at C34 (Centro SPGR) R Verify  
PLAT793\_ALERT\_4\_G Model has Chirality at C37 (Centro SPGR) R Verify  
PLAT793\_ALERT\_4\_G Model has Chirality at C44 (Centro SPGR) S Verify  
PLAT910\_ALERT\_3\_G Missing # of FCF Reflection(s) Below Theta(Min). 4 Note  
PLAT912\_ALERT\_4\_G Missing # of FCF Reflections Above STh/L= 0.600 110 Note  
PLAT933\_ALERT\_2\_G Number of HKL-OMIT Records in Embedded .res File 7 Note  
PLAT941\_ALERT\_3\_G Average HKL Measurement Multiplicity ..... 4.0 Low  
PLAT978\_ALERT\_2\_G Number C-C Bonds with Positive Residual Density. 21 Info

---

0 **ALERT level A** = Most likely a serious problem - resolve or explain

1 **ALERT level B** = A potentially serious problem, consider carefully

4 **ALERT level C** = Check. Ensure it is not caused by an omission or oversight

16 **ALERT level G** = General information/check it is not something unexpected

3 ALERT type 1 CIF construction/syntax error, inconsistent or missing data

4 ALERT type 2 Indicator that the structure model may be wrong or deficient

4 ALERT type 3 Indicator that the structure quality may be low

10 ALERT type 4 Improvement, methodology, query or suggestion

0 ALERT type 5 Informative message, check

---

It is advisable to attempt to resolve as many as possible of the alerts in all categories. Often the minor alerts point to easily fixed oversights, errors and omissions in your CIF or refinement strategy, so attention to these fine details can be worthwhile. In order to resolve some of the more serious problems it may be necessary to carry out additional measurements or structure refinements. However, the purpose of your study may justify the reported deviations and the more serious of these should normally be commented upon in the discussion or experimental section of a paper or in the "special\_details" fields of the CIF. checkCIF was carefully designed to identify outliers and unusual parameters, but every test has its limitations and alerts that are not important in a particular case may appear. Conversely, the absence of alerts does not guarantee there are no aspects of the results needing attention. It is up to the individual to critically assess their own results and, if necessary, seek expert advice.

### **Publication of your CIF in IUCr journals**

A basic structural check has been run on your CIF. These basic checks will be run on all CIFs submitted for publication in IUCr journals (*Acta Crystallographica*, *Journal of Applied Crystallography*, *Journal of Synchrotron Radiation*); however, if you intend to submit to *Acta Crystallographica Section C* or *E* or *IUCrData*, you should make sure that full publication checks are run on the final version of your CIF prior to submission.

### **Publication of your CIF in other journals**

Please refer to the *Notes for Authors* of the relevant journal for any special instructions relating to CIF submission.

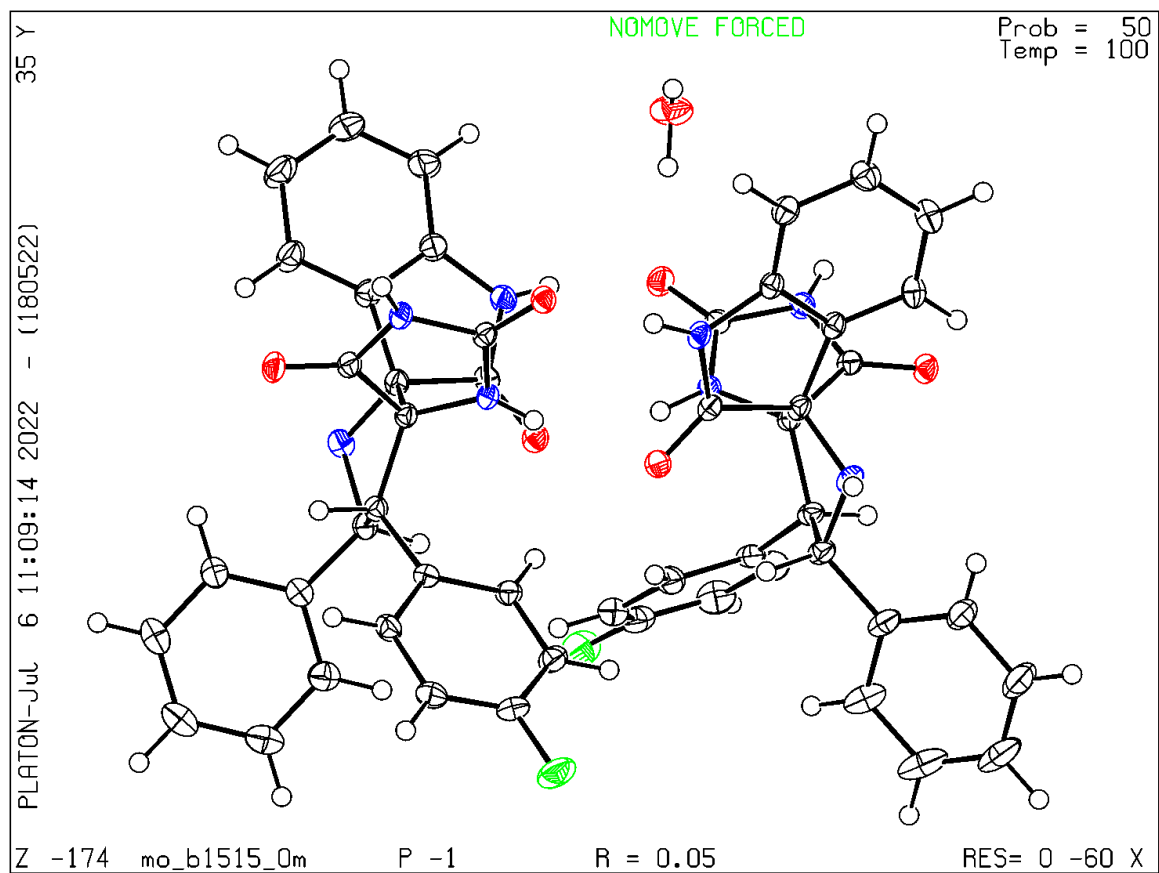

Supplement: s1 [file s1]
