# Supplementary material for: Synthesis of Tetracyclic Spirooxindolepyrrolidine-Engrafted Hydantoin Scaffolds: Crystallographic Analysis, Molecular Docking Studies and Evaluation of Their Antimicrobial, Anti-Inflammatory and Analgesic Activities
Source: Molecules. 2023 Nov 6;28(21):7443. doi: 10.3390/molecules28217443 (PMC10650415; doi:10.3390/molecules28217443)
Supplement: Supplementary file 1 [file molecules-28-07443-s001.zip › mo_b1515_0m.cif]

#######################################################################
#
#                 Cambridge Crystallographic Data Centre
#                                CCDC 
#
#######################################################################
#
# If this CIF has been generated from an entry in the Cambridge 
# Structural Database, then it will include bibliographic, chemical, 
# crystal, experimental, refinement or atomic coordinate data resulting 
# from the CCDC's data processing and validation procedures.
#
#######################################################################

data_mo_b1515_0m
_symmetry_cell_setting           triclinic
_symmetry_space_group_name_H-M   'P -1'
_symmetry_Int_Tables_number      2
_space_group_name_Hall           '-P 1'
loop_
_symmetry_equiv_pos_site_id
_symmetry_equiv_pos_as_xyz
1 x,y,z
2 -x,-y,-z
_cell_length_a                   12.1123(9)
_cell_length_b                   12.5291(10)
_cell_length_c                   15.0421(11)
_cell_angle_alpha                95.793(3)
_cell_angle_beta                 91.329(3)
_cell_angle_gamma                99.674(3)
_cell_volume                     2236.9
loop_
_atom_site_label
_atom_site_type_symbol
_atom_site_fract_x
_atom_site_fract_y
_atom_site_fract_z
_atom_site_U_iso_or_equiv
_atom_site_thermal_displace_type
F2 F 0.61162(9) 0.65012(8) 0.05950(8) 0.0356 Uani
O6 O 0.62637(7) 0.34684(8) 0.46910(6) 0.0176 Uani
O4 O 0.38002(8) 0.16807(8) 0.22659(7) 0.0193 Uani
O5 O 0.81911(8) 0.15399(8) 0.27201(7) 0.0214 Uani
N7 N 0.58890(9) 0.27996(9) 0.32008(7) 0.0153 Uani
N6 N 0.74137(9) 0.24600(9) 0.38831(8) 0.0176 Uani
N8 N 0.56939(9) 0.05406(9) 0.14651(8) 0.0187 Uani
N5 N 0.39867(10) 0.04836(10) 0.33018(8) 0.0199 Uani
C43 C 0.54206(11) 0.38887(11) 0.14436(8) 0.0182 Uani
H43 H 0.479664 0.345083 0.167331 0.0220 Uiso
C26 C 0.43345(10) 0.10822(10) 0.26239(9) 0.0171 Uani
C36 C 0.64841(10) 0.29745(10) 0.39905(8) 0.0153 Uani
C35 C 0.74405(10) 0.19696(10) 0.30305(9) 0.0169 Uani
C44 C 0.57346(10) 0.14852(10) 0.09627(8) 0.0173 Uani
H44 H 0.497400 0.169040 0.091660 0.0210 Uiso
C37 C 0.65330(10) 0.23695(10) 0.15772(8) 0.0159 Uani
H37 H 0.731391 0.226335 0.144119 0.0190 Uiso
C38 C 0.64390(10) 0.35041(10) 0.13715(8) 0.0162 Uani
C34 C 0.63267(10) 0.20547(10) 0.25498(8) 0.0152 Uani
C27 C 0.55404(10) 0.08928(10) 0.23959(9) 0.0165 Uani
C28 C 0.57177(11) 0.00518(10) 0.30144(9) 0.0192 Uani
C39 C 0.73412(11) 0.41510(11) 0.10163(9) 0.0197 Uani
H39 H 0.803557 0.389797 0.096012 0.0240 Uiso
C33 C 0.47752(12) -0.01599(11) 0.35289(9) 0.0207 Uani
C45 C 0.61966(11) 0.13255(11) 0.00450(9) 0.0189 Uani
C50 C 0.69657(12) 0.06246(12) -0.01431(9) 0.0228 Uani
H50 H 0.715870 0.018533 0.029565 0.0270 Uiso
C40 C 0.72388(12) 0.51583(12) 0.07442(10) 0.0238 Uani
H40 H 0.785213 0.559468 0.049998 0.0290 Uiso
C29 C 0.65817(12) -0.05398(11) 0.30838(11) 0.0247 Uani
H29 H 0.721098 -0.042575 0.271828 0.0300 Uiso
C41 C 0.62208(13) 0.55085(12) 0.08382(10) 0.0237 Uani
C46 C 0.59089(13) 0.19511(12) -0.06137(10) 0.0245 Uani
H46 H 0.537243 0.241488 -0.049668 0.0290 Uiso
C49 C 0.74490(13) 0.05710(13) -0.09752(10) 0.0275 Uani
H49 H 0.796638 0.008947 -0.110218 0.0330 Uiso
C42 C 0.53073(12) 0.48981(12) 0.11854(9) 0.0217 Uani
H42 H 0.461920 0.516230 0.124589 0.0260 Uiso
C48 C 0.71819(13) 0.12132(13) -0.16183(10) 0.0285 Uani
H48 H 0.752910 0.118489 -0.217802 0.0340 Uiso
C47 C 0.64033(14) 0.19007(13) -0.14429(10) 0.0293 Uani
H47 H 0.620916 0.233389 -0.188592 0.0350 Uiso
C32 C 0.46741(14) -0.09285(12) 0.41354(11) 0.0273 Uani
H32 H 0.402609 -0.106742 0.447778 0.0330 Uiso
C30 C 0.65063(14) -0.13085(13) 0.37043(12) 0.0311 Uani
H30 H 0.709841 -0.170758 0.377280 0.0370 Uiso
C31 C 0.55669(16) -0.14902(13) 0.42211(12) 0.0325 Uani
H31 H 0.553297 -0.200950 0.464262 0.0390 Uiso
H8 H 0.5172(19) -0.0047(18) 0.1263(14) 0.0350 Uiso
H7 H 0.5319(17) 0.3098(16) 0.3116(13) 0.0260 Uiso
H6 H 0.803(2) 0.2605(19) 0.4262(15) 0.0410 Uiso
H5 H 0.331(2) 0.044(2) 0.3484(16) 0.0480 Uiso
O1 O 0.39590(8) 0.39731(8) 0.31521(6) 0.0191 Uani
F1 F 0.10848(10) 0.09498(9) -0.04478(7) 0.0389 Uani
O2 O -0.02673(7) 0.33316(8) 0.42789(7) 0.0196 Uani
O3 O 0.16768(9) 0.05256(8) 0.37103(7) 0.0239 Uani
N3 N 0.19794(9) 0.22888(9) 0.33301(7) 0.0158 Uani
N1 N 0.40619(9) 0.39293(9) 0.46738(8) 0.0172 Uani
N2 N 0.05422(9) 0.17875(10) 0.41661(8) 0.0197 Uani
N4 N 0.20427(9) 0.51872(9) 0.37494(8) 0.0190 Uani
C11 C 0.14353(10) 0.14461(11) 0.37224(9) 0.0180 Uani
C10 C 0.04722(10) 0.28391(10) 0.40352(8) 0.0163 Uani
C8 C 0.33636(10) 0.40661(10) 0.53967(9) 0.0165 Uani
C1 C 0.35429(10) 0.40269(10) 0.38884(9) 0.0158 Uani
C3 C 0.23203(10) 0.42423(10) 0.50828(9) 0.0165 Uani
C2 C 0.23233(10) 0.42128(10) 0.40791(8) 0.0159 Uani
C7 C 0.36409(11) 0.41025(11) 0.62959(9) 0.0204 Uani
H7A H 0.435226 0.397676 0.649779 0.0240 Uiso
C9 C 0.14949(10) 0.32730(10) 0.35087(8) 0.0154 Uani
C19 C 0.18423(10) 0.49806(11) 0.27813(9) 0.0192 Uani
H19 H 0.256711 0.495951 0.248045 0.0230 Uiso
C20 C 0.12458(11) 0.58248(12) 0.24140(11) 0.0241 Uani
C4 C 0.15335(11) 0.45078(11) 0.56854(9) 0.0208 Uani
H4A H 0.083333 0.465969 0.548243 0.0250 Uiso
C6 C 0.28267(12) 0.43329(12) 0.68956(9) 0.0235 Uani
H6A H 0.297894 0.434427 0.751922 0.0280 Uiso
C13 C 0.11169(11) 0.31253(11) 0.18094(9) 0.0187 Uani
C14 C 0.21087(11) 0.30052(12) 0.13818(10) 0.0226 Uani
H14 H 0.279835 0.342748 0.161662 0.0270 Uiso
C5 C 0.17979(12) 0.45459(12) 0.65974(10) 0.0241 Uani
H5A H 0.126788 0.471968 0.702042 0.0290 Uiso
C18 C 0.01135(12) 0.25077(13) 0.14427(10) 0.0249 Uani
H18 H -0.056874 0.258846 0.171989 0.0300 Uiso
C12 C 0.11148(10) 0.38242(11) 0.26865(9) 0.0171 Uani
H12 H 0.032216 0.392404 0.277937 0.0210 Uiso
C16 C 0.10900(14) 0.16779(13) 0.02885(10) 0.0275 Uani
C15 C 0.21022(13) 0.22776(13) 0.06183(10) 0.0263 Uani
H15 H 0.277815 0.219605 0.033154 0.0320 Uiso
C17 C 0.00907(14) 0.17775(14) 0.06814(11) 0.0311 Uani
H17 H -0.059580 0.135761 0.043765 0.0370 Uiso
C25 C 0.08740(13) 0.66325(14) 0.29698(12) 0.0308 Uani
H25 H 0.100937 0.667838 0.359829 0.0370 Uiso
C21 C 0.10464(16) 0.57792(15) 0.14922(13) 0.0357 Uani
H21 H 0.131001 0.524025 0.110275 0.0430 Uiso
C24 C 0.03004(15) 0.73798(16) 0.26085(15) 0.0407 Uani
H24 H 0.005283 0.793359 0.299275 0.0490 Uiso
C23 C 0.00921(15) 0.73167(16) 0.16958(16) 0.0428 Uani
H23 H -0.030483 0.782073 0.145388 0.0510 Uiso
C22 C 0.04614(18) 0.65214(17) 0.11383(15) 0.0439 Uani
H22 H 0.031829 0.647668 0.051087 0.0530 Uiso
H4 H 0.2561(19) 0.5811(18) 0.3951(15) 0.0360 Uiso
H1 H 0.4758(18) 0.3838(18) 0.4712(14) 0.0340 Uiso
H3 H 0.2539(18) 0.2221(17) 0.2974(14) 0.0320 Uiso
H2 H -0.0026(19) 0.1323(19) 0.4397(15) 0.0390 Uiso
O7 O 0.13830(10) -0.06758(12) 0.51596(10) 0.0361 Uani
H7B H 0.143(2) -0.033(2) 0.4657(19) 0.0600 Uiso
H7C H 0.186(3) -0.030(3) 0.558(2) 0.0780 Uiso
loop_
_atom_site_aniso_label
_atom_site_aniso_U_11
_atom_site_aniso_U_22
_atom_site_aniso_U_33
_atom_site_aniso_U_23
_atom_site_aniso_U_13
_atom_site_aniso_U_12
F2 0.0377(5) 0.0265(5) 0.0472(6) 0.0210(4) 0.0034(4) 0.0080(4)
O6 0.0134(4) 0.0211(4) 0.0185(4) 0.0015(3) 0.0002(3) 0.0036(3)
O4 0.0148(4) 0.0203(4) 0.0228(4) 0.0036(3) 0.0011(3) 0.0026(3)
O5 0.0154(4) 0.0240(5) 0.0266(5) 0.0035(4) 0.0035(3) 0.0080(3)
N7 0.0122(4) 0.0170(5) 0.0173(5) 0.0020(4) 0.0002(3) 0.0044(3)
N6 0.0119(4) 0.0228(5) 0.0192(5) 0.0029(4) -0.0001(3) 0.0057(4)
N8 0.0188(5) 0.0162(5) 0.0200(5) 0.0006(4) 0.0028(4) 0.0007(4)
N5 0.0173(5) 0.0195(5) 0.0235(5) 0.0052(4) 0.0059(4) 0.0024(4)
C43 0.0168(5) 0.0200(6) 0.0183(5) 0.0052(4) 0.0010(4) 0.0030(4)
C26 0.0148(5) 0.0161(5) 0.0193(5) 0.0006(4) 0.0021(4) -0.0001(4)
C36 0.0107(5) 0.0157(5) 0.0199(5) 0.0043(4) 0.0006(4) 0.0017(4)
C35 0.0131(5) 0.0179(5) 0.0201(5) 0.0043(4) 0.0015(4) 0.0026(4)
C44 0.0153(5) 0.0179(5) 0.0186(5) 0.0015(4) 0.0013(4) 0.0025(4)
C37 0.0135(5) 0.0161(5) 0.0182(5) 0.0025(4) 0.0018(4) 0.0023(4)
C38 0.0167(5) 0.0169(5) 0.0149(5) 0.0028(4) 0.0010(4) 0.0020(4)
C34 0.0126(5) 0.0157(5) 0.0178(5) 0.0026(4) 0.0017(4) 0.0035(4)
C27 0.0136(5) 0.0157(5) 0.0200(5) 0.0024(4) 0.0022(4) 0.0015(4)
C28 0.0185(5) 0.0152(5) 0.0240(6) 0.0035(4) 0.0021(4) 0.0023(4)
C39 0.0188(5) 0.0206(6) 0.0200(6) 0.0037(4) 0.0054(4) 0.0027(4)
C33 0.0220(6) 0.0174(5) 0.0231(6) 0.0036(5) 0.0037(5) 0.0035(4)
C45 0.0180(5) 0.0189(6) 0.0185(5) -0.0001(4) 0.0010(4) 0.0007(4)
C50 0.0207(6) 0.0256(6) 0.0218(6) -0.0002(5) 0.0019(5) 0.0049(5)
C40 0.0249(6) 0.0229(6) 0.0243(6) 0.0087(5) 0.0065(5) 0.0014(5)
C29 0.0234(6) 0.0184(6) 0.0343(7) 0.0064(5) 0.0031(5) 0.0067(5)
C41 0.0288(7) 0.0210(6) 0.0230(6) 0.0097(5) -0.0003(5) 0.0048(5)
C46 0.0282(7) 0.0219(6) 0.0228(6) 0.0022(5) 0.0001(5) 0.0030(5)
C49 0.0230(6) 0.0326(7) 0.0248(7) -0.0039(6) 0.0052(5) 0.0023(5)
C42 0.0201(6) 0.0230(6) 0.0237(6) 0.0067(5) -0.0008(5) 0.0059(5)
C48 0.0290(7) 0.0303(7) 0.0212(6) -0.0022(5) 0.0053(5) -0.0065(6)
C47 0.0372(8) 0.0264(7) 0.0223(6) 0.0044(5) 0.0010(6) -0.0017(6)
C32 0.0342(7) 0.0211(6) 0.0283(7) 0.0082(5) 0.0084(6) 0.0050(5)
C30 0.0338(8) 0.0213(7) 0.0417(9) 0.0107(6) 0.0024(6) 0.0105(6)
C31 0.0432(9) 0.0227(7) 0.0351(8) 0.0132(6) 0.0058(7) 0.0094(6)
O1 0.0139(4) 0.0219(4) 0.0219(4) 0.0051(3) 0.0023(3) 0.0025(3)
F1 0.0557(7) 0.0341(5) 0.0277(5) -0.0033(4) -0.0072(4) 0.0149(5)
O2 0.0120(4) 0.0226(4) 0.0247(5) 0.0035(4) 0.0013(3) 0.0036(3)
O3 0.0216(5) 0.0191(4) 0.0336(5) 0.0103(4) 0.0086(4) 0.0059(4)
N3 0.0124(4) 0.0164(5) 0.0194(5) 0.0050(4) 0.0035(3) 0.0024(3)
N1 0.0110(4) 0.0196(5) 0.0216(5) 0.0030(4) 0.0002(4) 0.0042(4)
N2 0.0148(5) 0.0201(5) 0.0262(5) 0.0098(4) 0.0065(4) 0.0037(4)
N4 0.0161(5) 0.0165(5) 0.0251(5) 0.0055(4) -0.0016(4) 0.0036(4)
C11 0.0146(5) 0.0189(5) 0.0215(6) 0.0071(4) 0.0026(4) 0.0027(4)
C10 0.0118(5) 0.0191(5) 0.0183(5) 0.0049(4) -0.0002(4) 0.0017(4)
C8 0.0141(5) 0.0146(5) 0.0208(6) 0.0018(4) 0.0004(4) 0.0025(4)
C1 0.0118(5) 0.0137(5) 0.0219(6) 0.0040(4) 0.0002(4) 0.0012(4)
C3 0.0133(5) 0.0160(5) 0.0202(5) 0.0020(4) -0.0001(4) 0.0023(4)
C2 0.0111(5) 0.0168(5) 0.0205(5) 0.0043(4) -0.0001(4) 0.0034(4)
C7 0.0182(5) 0.0204(6) 0.0223(6) 0.0010(5) -0.0022(4) 0.0037(4)
C9 0.0112(5) 0.0179(5) 0.0179(5) 0.0058(4) 0.0009(4) 0.0026(4)
C19 0.0146(5) 0.0201(6) 0.0241(6) 0.0086(5) 0.0003(4) 0.0028(4)
C20 0.0164(5) 0.0228(6) 0.0350(7) 0.0150(5) -0.0015(5) 0.0023(5)
C4 0.0149(5) 0.0226(6) 0.0244(6) -0.0011(5) 0.0017(4) 0.0040(4)
C6 0.0240(6) 0.0257(6) 0.0196(6) -0.0009(5) -0.0002(5) 0.0030(5)
C13 0.0157(5) 0.0225(6) 0.0187(5) 0.0086(4) -0.0003(4) 0.0019(4)
C14 0.0180(6) 0.0266(6) 0.0238(6) 0.0070(5) 0.0024(4) 0.0028(5)
C5 0.0204(6) 0.0281(7) 0.0224(6) -0.0034(5) 0.0031(5) 0.0034(5)
C18 0.0185(6) 0.0294(7) 0.0259(6) 0.0065(5) -0.0022(5) -0.0004(5)
C12 0.0122(5) 0.0204(5) 0.0198(5) 0.0078(4) -0.0003(4) 0.0024(4)
C16 0.0382(8) 0.0248(7) 0.0204(6) 0.0043(5) -0.0045(5) 0.0079(6)
C15 0.0280(7) 0.0286(7) 0.0245(6) 0.0082(5) 0.0042(5) 0.0079(5)
C17 0.0289(7) 0.0323(8) 0.0295(7) 0.0028(6) -0.0079(6) -0.0003(6)
C25 0.0257(7) 0.0316(8) 0.0411(9) 0.0181(7) 0.0074(6) 0.0127(6)
C21 0.0412(9) 0.0307(8) 0.0370(9) 0.0136(7) -0.0093(7) 0.0072(7)
C24 0.0318(8) 0.0376(9) 0.0620(12) 0.0271(9) 0.0101(8) 0.0184(7)
C23 0.0285(8) 0.0395(9) 0.0668(13) 0.0324(9) -0.0051(8) 0.0089(7)
C22 0.0461(10) 0.0381(9) 0.0494(11) 0.0234(8) -0.0161(8) 0.0042(8)
O7 0.0267(6) 0.0425(7) 0.0397(7) 0.0225(6) 0.0024(5) -0.0037(5)

#END
